# Supplementary material for: The Diagnosis of Anger as a Presenting Complaint in Outpatient Medical Settings
Source: Atypon-hosted journal article supplement (doi:10.1176/appi.ps.201200329), 2013-09-01
Supplement: 921_ds001.pdf [file 921_ds001.pdf]

Table 1 Demographic Characteristics of the Sample

|                                                | <i>N</i> | %    |
|------------------------------------------------|----------|------|
| <b>Race (N = 1,054)</b>                        |          |      |
| White                                          | 932      | 88.4 |
| Black                                          | 106      | 10.1 |
| Hispanic                                       | 16       | 1.5  |
| <b>Sex (N = 1,146)</b>                         |          |      |
| Female                                         | 603      | 52.6 |
| Male                                           | 543      | 47.4 |
| <b>Insurance Status (N = 1,036)</b>            |          |      |
| Private                                        | 494      | 47.7 |
| Uninsured                                      | 187      | 18.1 |
| Medicaid                                       | 211      | 20.4 |
| Medicare                                       | 144      | 13.9 |
| <b>Age (N = 1,146)</b>                         |          |      |
| 18-24                                          | 157      | 13.7 |
| 25-34                                          | 237      | 20.7 |
| 35-44                                          | 278      | 24.3 |
| 45-54                                          | 262      | 22.9 |
| 55-64                                          | 131      | 11.4 |
| Over 64                                        | 81       | 7.1  |
| <b>Physician Specialty Seen By...(N = 554)</b> |          |      |
| Psychiatrist                                   | 477      | 86.1 |
| Primary                                        |          |      |
| Care                                           | 49       | 8.8  |
| Other                                          | 28       | 5.1  |

Table 2 Demographic predictors of anger as a reason for visit

|           | <b>OR</b> | <b>SE</b> | <b>t</b> | <b>p</b> | <b>95% CI</b> |
|-----------|-----------|-----------|----------|----------|---------------|
| White     | 1.92      | 0.30      | 4.2      | < .001   | 1.4-2.6       |
| Hispanic  | 0.76      | 0.30      | -0.7     | ns       | 0.4-1.7       |
| Male      | 1.56      | 0.19      | 3.6      | < .001   | 1.2-2.0       |
| Medicaid  | 1.43      | 0.28      | 1.8      | 0.07     | 1.0-2.1       |
| Medicare  | 1.29      | 0.30      | 1.1      | ns       | 0.8-2.0       |
| Uninsured | 2.55      | 0.43      | 5.5      | < .001   | 1.8-3.6       |
| 18-24     | 6.85      | 2.45      | 5.4      | < .001   | 3.4-13.8      |
| 25-34     | 4.91      | 1.69      | 4.6      | < .001   | 2.5-9.6       |
| 35-44     | 6.03      | 1.92      | 5.7      | < .001   | 3.2-11.2      |
| 45-54     | 5.06      | 1.56      | 5.3      | < .001   | 2.8-.93       |
| 55-64     | 2.96      | 0.93      | 3.5      | < .001   | 1.6-5.5       |
